# Supplementary material for: Effects of nitrogen and phosphorus additions on nitrous oxide emission in a nitrogen-rich and two nitrogen-limited tropical forests
Source: Copernicus journal article supplement (doi:10.5194/bg-13-3503-2016), 2016-06-16
Supplement: Supplementary file 1 [file bg-13-3503-2016-supplement.pdf]

Supplement of Biogeosciences, 13, 3503–3517, 2016  
<http://www.biogeosciences.net/13/3503/2016/>  
doi:10.5194/bg-13-3503-2016-supplement  
© Author(s) 2016. CC Attribution 3.0 License.

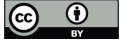

*Supplement of*

## **Effects of nitrogen and phosphorus additions on nitrous oxide emission in a nitrogen-rich and two nitrogen-limited tropical forests**

**Mianhai Zheng et al.**

*Correspondence to:* Jiangming Mo (mojm@scib.ac.cn)

The copyright of individual parts of the supplement might differ from the CC-BY 3.0 licence.

**Table S1.** Soil properties in different fertilization plots in three study forests.

| Treatment         | pH       | NH <sub>4</sub> <sup>+</sup><br>(mg kg <sup>-1</sup> ) | NO <sub>3</sub> <sup>-</sup><br>(mg kg <sup>-1</sup> ) | NH <sub>4</sub> <sup>+</sup> + NO <sub>3</sub> <sup>-</sup><br>(mg kg <sup>-1</sup> ) | Soil organic C<br>(%) | Microbial biomass C<br>(mg kg <sup>-1</sup> ) | Available P<br>(mg kg <sup>-1</sup> ) |
|-------------------|----------|--------------------------------------------------------|--------------------------------------------------------|---------------------------------------------------------------------------------------|-----------------------|-----------------------------------------------|---------------------------------------|
| Old-growth forest |          |                                                        |                                                        |                                                                                       |                       |                                               |                                       |
| C                 | 3.9(0.0) | 2.4(0.3)                                               | 4.2(0.2)                                               | 6.7(0.5)                                                                              | 4.0(0.2)              | 551.9(38.5)                                   | 2.1(0.4)                              |
| N                 | 3.9(0.0) | 2.4(0.2)                                               | 3.7(0.4)                                               | 6.0(0.5)                                                                              | 4.5(0.2)              | 489.3(24.7)                                   | 1.5(0.4)                              |
| P                 | 4.0(0.0) | 2.6(0.2)                                               | 3.7(0.4)                                               | 6.3(0.4)                                                                              | 4.1(0.3)              | 463.1(30.8)                                   | 1.9(0.2)                              |
| NP                | 3.9(0.0) | 2.8(0.2)                                               | 3.6(0.5)                                               | 6.4(0.5)                                                                              | 4.6(0.2)              | 456.1(38.4)                                   | 2.1(0.2)                              |
| Mixed forest      |          |                                                        |                                                        |                                                                                       |                       |                                               |                                       |
| C                 | 4.0(0.0) | 1.4(0.1)                                               | 1.3(0.2)                                               | 2.7(0.2)                                                                              | 2.8(0.2)              | 75.9(7.0)                                     | 0.9(0.1)                              |
| N                 | 4.1(0.0) | 1.6(0.1)                                               | 1.0(0.1)                                               | 2.6(0.2)                                                                              | 2.6(0.1)              | 85.8(6.6)                                     | 0.7(0.3)                              |
| P                 | 4.0(0.0) | 1.4(0.1)                                               | 1.0(0.1)                                               | 2.3(0.2)                                                                              | 3.0(0.2)              | 75.7(5.1)                                     | 0.8(0.2)                              |
| NP                | 4.1(0.0) | 1.6(0.1)                                               | 1.3(0.1)                                               | 2.9(0.2)                                                                              | 2.9(0.1)              | 90.0(7.1)                                     | 0.7(0.1)                              |
| Pine forest       |          |                                                        |                                                        |                                                                                       |                       |                                               |                                       |
| C                 | 4.0(0.0) | 2.4(0.3)                                               | 3.3(0.5)                                               | 5.7(0.3)                                                                              | 2.9(0.3)              | 165.6(10.3)                                   | 1.1(0.2)                              |
| N                 | 4.0(0.0) | 2.2(0.2)                                               | 3.1(0.3)                                               | 5.3(0.2)                                                                              | 3.0(0.2)              | 179.4(13.2)                                   | 0.8(0.1)                              |
| P                 | 3.9(0.1) | 2.1(0.1)                                               | 3.0(0.5)                                               | 5.1(0.4)                                                                              | 3.3(0.5)              | 146.3(31.8)                                   | 1.0(0.1)                              |
| NP                | 3.9(0.1) | 2.1(0.2)                                               | 3.0(0.4)                                               | 5.2(0.5)                                                                              | 3.4(0.2)              | 143.3(19.0)                                   | 1.3(0.2)                              |

Notes: Soil samples were collected in early February 2007 before the start of fertilization. Values are means with standard error in parentheses (n = 5). There was no statistical difference of soil properties among the treatments in each forest, as determined by one-way ANOVA.

**Table S2.** Effects of N and P addition on soil properties in different sampling periods in the old-growth forest.

| Statistical analyses                                                                    |               | One-way ANOVA |              |               |               | Repeated measures ANOVA |    |    |
|-----------------------------------------------------------------------------------------|---------------|---------------|--------------|---------------|---------------|-------------------------|----|----|
|                                                                                         |               | Treatment     | C            | N             | P             | NP                      | N  | P  |
| pH                                                                                      | 2007 August   | 4.0(0.0)b     | 4.0(0.0)b    | 4.1(0.0)a     | 4.1(0.0)a     |                         |    |    |
|                                                                                         | 2008 February | 4.0(0.1)ab    | 3.9(0.0)b    | 4.0(0.0)a     | 4.0(0.0)ab    |                         |    |    |
|                                                                                         | 2008 August   | 3.8(0.0)      | 3.8(0.0)     | 3.9(0.1)      | 3.9(0.0)      | ns                      | ** | ns |
|                                                                                         | 2009 February | 3.9(0.0)b     | 3.9(0.0)b    | 4.0(0.0)a     | 3.9(0.0)b     |                         |    |    |
|                                                                                         | 2009 August   | 3.8(0.0)      | 3.8(0.0)     | 3.9(0.0)      | 3.9(0.0)      |                         |    |    |
| NH <sub>4</sub> <sup>+</sup><br>(mg kg <sup>-1</sup> )                                  | 2007 August   | 12.3(1.3)     | 15.0(1.2)    | 11.1(1.8)     | 17.0(3.7)     |                         |    |    |
|                                                                                         | 2008 February | 11.1(1.3)     | 12.3(1.4)    | 11.2(1.5)     | 10.8(2.2)     |                         |    |    |
|                                                                                         | 2008 August   | 4.4(1.1)      | 4.4(1.2)     | 5.7(0.9)      | 4.8(0.7)      | ns                      | ns | ns |
|                                                                                         | 2009 February | 10.1(0.8)     | 12.4(1.1)    | 12.5(1.6)     | 11.5(0.9)     |                         |    |    |
|                                                                                         | 2009 August   | 5.5(0.2)      | 6.4(0.4)     | 7.0(0.6)      | 7.0(0.6)      |                         |    |    |
| NO <sub>3</sub> <sup>-</sup><br>(mg kg <sup>-1</sup> )                                  | 2007 August   | 7.0(1.6)      | 7.0(0.2)     | 4.8(3.0)      | 3.6(0.6)      |                         |    |    |
|                                                                                         | 2008 February | 8.6(1.3)b     | 13.4(0.8)a   | 9.6(1.2)ab    | 6.6(1.0)b     |                         |    |    |
|                                                                                         | 2008 August   | 3.0(0.3)a     | 2.2(0.5)a    | 0.6(0.2)b     | 0.3(0.1)b     | ns                      | ** | ns |
|                                                                                         | 2009 February | 5.4(0.4)a     | 5.0(0.3)a    | 3.9(0.3)b     | 3.9(0.2)b     |                         |    |    |
|                                                                                         | 2009 August   | 5.5(0.5)a     | 5.2(0.6)a    | 3.7(0.7)ab    | 3.2(0.3)b     |                         |    |    |
| NH <sub>4</sub> <sup>+</sup><br>+NO <sub>3</sub> <sup>-</sup><br>(mg kg <sup>-1</sup> ) | 2007 August   | 19.3(0.9)     | 22.0(1.4)    | 16.9(2.3)     | 20.6(3.5)     |                         |    |    |
|                                                                                         | 2008 February | 19.7(2.0)ab   | 25.7(2.1)a   | 20.8(2.2)ab   | 17.4(2.8)b    |                         |    |    |
|                                                                                         | 2008 August   | 7.4(1.2)      | 6.6(0.9)     | 6.3(1.1)      | 5.1(0.7)      | ns                      | ns | ns |
|                                                                                         | 2009 February | 15.5(0.9)     | 17.4(1.1)    | 16.4(1.3)     | 15.5(0.9)     |                         |    |    |
|                                                                                         | 2009 August   | 11.0(0.4)     | 11.7(0.7)    | 10.8(0.3)     | 10.2(0.6)     |                         |    |    |
| Available<br>P<br>(mg kg <sup>-1</sup> )                                                | 2007 August   | 2.2(0.5)b     | 2.3(0.2)b    | 12.1(2.7)a    | 10.7(2.8)a    |                         |    |    |
|                                                                                         | 2008 February | 0.4(0.0)b     | 0.4(0.0)b    | 1.7(0.3)a     | 1.1(0.1)a     |                         |    |    |
|                                                                                         | 2008 August   | 0.5(0.1)c     | 0.9(0.1)c    | 2.8(0.4)a     | 1.8(0.3)b     | ns                      | ** | *  |
|                                                                                         | 2009 February | 2.1(0.4)b     | 6.5(2.4)ab   | 12.7(1.1)a    | 8.2(1.9)ab    |                         |    |    |
|                                                                                         | 2009 August   | 1.8(0.1)b     | 3.4(0.5)b    | 14.1(4.0)a    | 6.9(1.9)ab    |                         |    |    |
| Soil<br>organic C<br>(%)                                                                | 2007 August   | 4.2(0.5)      | 4.2(0.2)     | 4.9(0.4)      | 4.0(0.3)      |                         |    |    |
|                                                                                         | 2008 February | 3.6(0.5)b     | 4.4(0.3)ab   | 4.2(0.3)ab    | 4.9(0.3)a     |                         |    |    |
|                                                                                         | 2008 August   | 4.4(0.4)      | 4.9(0.5)     | 5.3(0.2)      | 4.4(0.4)      | ns                      | ns | ns |
|                                                                                         | 2009 February | 4.3(0.5)      | 4.5(0.4)     | 4.6(0.3)      | 4.0(0.2)      |                         |    |    |
|                                                                                         | 2009 August   | 4.0(0.5)      | 5.1(0.6)     | 5.3(0.1)      | 4.7(0.5)      |                         |    |    |
| Microbial<br>biomass C<br>(mg kg <sup>-1</sup> )                                        | 2007 August   | 443.1(20.5)ab | 366.0(29.9)b | 516.3(50.1)a  | 504.9(43.0)a  |                         |    |    |
|                                                                                         | 2008 February | 177.8(5.3)ab  | 141.4(11.1)b | 174.2(24.1)ab | 201.1(13.2)a  |                         |    |    |
|                                                                                         | 2008 August   | 522.3(13.5)   | 396.0(73.1)  | 389.0(52.3)   | 479.9(55.0)   | ns                      | *  | *  |
|                                                                                         | 2009 February | 295.3(44.2)   | 214.1(20.5)  | 277.2(19.1)   | 281.8(20.0)   |                         |    |    |
|                                                                                         | 2009 August   | 732.9(80.9)b  | 682.1(25.5)b | 756.3(55.7)ab | 975.3(109.5)a |                         |    |    |

Notes: Values are means with standard error in parentheses (n = 5). February and August is within the dry and wet season, respectively in the study region. Different lowercase letters represent significant difference among the treatments. ‘\*\*\*’, ‘\*’ and ‘ns’ represent statistical difference of  $P < 0.01$ ,  $P < 0.05$  and  $P > 0.05$ , respectively.

**Table S3.** Effects of N and P addition on soil properties in different sampling periods in the mixed forest.

| Statistical analyses                                                                    |               | One-way ANOVA |               |               |              | Repeated measures ANOVA |    |    |
|-----------------------------------------------------------------------------------------|---------------|---------------|---------------|---------------|--------------|-------------------------|----|----|
|                                                                                         |               | Treatment     | C             | N             | P            | NP                      | N  | P  |
| pH                                                                                      | 2007 August   | 4.2(0.1)      | 4.2(0.0)      | 4.2(0.0)      | 4.1(0.0)     |                         |    |    |
|                                                                                         | 2008 February | 4.1(0.0)      | 4.1(0.0)      | 4.1(0.0)      | 4.0(0.0)     |                         |    |    |
|                                                                                         | 2008 August   | 4.0(0.0)      | 4.0(0.0)      | 4.0(0.1)      | 3.9(0.0)     | ns                      | ns | *  |
|                                                                                         | 2009 February | 3.9(0.0)b     | 4.0(0.0)ab    | 4.1(0.0)a     | 4.0(0.0)ab   |                         |    |    |
|                                                                                         | 2009 August   | 4.1(0.0)ab    | 4.0(0.0)ab    | 4.1(0.0)a     | 4.0(0.0)b    |                         |    |    |
| NH <sub>4</sub> <sup>+</sup><br>(mg kg <sup>-1</sup> )                                  | 2007 August   | 12.9(1.4)     | 14.2(1.6)     | 14.4(1.1)     | 13.7(0.6)    |                         |    |    |
|                                                                                         | 2008 February | 9.7(0.8)      | 10.6(0.7)     | 11.0(1.3)     | 12.1(1.1)    |                         |    |    |
|                                                                                         | 2008 August   | 1.5(0.2)      | 2.1(0.2)      | 2.5(0.6)      | 2.4(0.4)     | ns                      | ns | ns |
|                                                                                         | 2009 February | 11.4(1.0)     | 10.3(0.7)     | 10.0(0.6)     | 9.9(0.3)     |                         |    |    |
|                                                                                         | 2009 August   | 6.3(0.4)      | 7.1(0.7)      | 6.4(0.4)      | 7.0(0.6)     |                         |    |    |
| NO <sub>3</sub> <sup>-</sup><br>(mg kg <sup>-1</sup> )                                  | 2007 August   | 1.6(0.2)ab    | 1.6(0.3)ab    | 0.7(0.2)b     | 1.8(0.3)a    |                         |    |    |
|                                                                                         | 2008 February | 1.0(0.2)a     | 1.0(0.2)a     | 0.1(0.0)b     | 0.9(0.2)ab   |                         |    |    |
|                                                                                         | 2008 August   | 0.2(0.1)      | 0.2(0.0)      | 0.1(0.0)      | 0.3(0.1)     | ns                      | *  | ** |
|                                                                                         | 2009 February | 4.2(0.2)a     | 3.8(0.2)ab    | 3.3(0.1)c     | 3.4(0.1)bc   |                         |    |    |
|                                                                                         | 2009 August   | 2.5(0.1)      | 2.5(0.3)      | 1.9(0.1)      | 2.8(0.5)     |                         |    |    |
| NH <sub>4</sub> <sup>+</sup><br>+NO <sub>3</sub> <sup>-</sup><br>(mg kg <sup>-1</sup> ) | 2007 August   | 14.5(1.4)     | 15.8(1.4)     | 15.2(1.2)     | 15.5(0.7)    |                         |    |    |
|                                                                                         | 2008 February | 10.8(0.9)     | 11.6(0.6)     | 11.1(1.3)     | 13.0(1.4)    |                         |    |    |
|                                                                                         | 2008 August   | 1.7(0.3)      | 2.3(0.3)      | 2.7(0.6)      | 2.7(0.3)     | ns                      | ns | ns |
|                                                                                         | 2009 February | 15.6(0.8)a    | 14.2(0.6)ab   | 13.3(0.6)b    | 13.2(0.3)b   |                         |    |    |
|                                                                                         | 2009 August   | 8.8(0.3)      | 9.6(1.0)      | 8.3(0.5)      | 9.8(0.8)     |                         |    |    |
| Available<br>P<br>(mg kg <sup>-1</sup> )                                                | 2007 August   | 1.5(0.5)b     | 1.3(0.2)b     | 12.3(4.7)a    | 13.5(3.1)a   |                         |    |    |
|                                                                                         | 2008 February | 0.4(0.0)b     | 0.4(0.0)b     | 1.6(0.5)a     | 1.6(0.4)a    |                         |    |    |
|                                                                                         | 2008 August   | 1.8(0.5)      | 2.9(1.0)      | 6.0(2.6)      | 3.2(0.7)     | ns                      | ** | ns |
|                                                                                         | 2009 February | 2.2(0.1)b     | 9.2(2.2)a     | 10.5(2.3)a    | 7.7(0.9)a    |                         |    |    |
|                                                                                         | 2009 August   | 1.4(0.1)b     | 4.8(1.3)a     | 5.5(1.3)a     | 2.8(0.5)ab   |                         |    |    |
| Soil<br>organic C<br>(%)                                                                | 2007 August   | 2.2(0.1)ab    | 2.7(0.2)a     | 1.9(0.3)b     | 2.5(0.1)ab   |                         |    |    |
|                                                                                         | 2008 February | 2.6(0.2)      | 3.0(0.2)      | 2.8(0.1)      | 3.0(0.2)     |                         |    |    |
|                                                                                         | 2008 August   | 2.4(0.1)      | 2.7(0.2)      | 3.0(0.3)      | 2.7(0.3)     | *                       | ns | ns |
|                                                                                         | 2009 February | 3.1(0.3)      | 2.9(0.3)      | 2.9(0.3)      | 3.3(0.3)     |                         |    |    |
|                                                                                         | 2009 August   | 1.7(0.2)b     | 2.5(0.3)ab    | 3.0(0.3)a     | 3.2(0.4)a    |                         |    |    |
| Microbial<br>biomass C<br>(mg kg <sup>-1</sup> )                                        | 2007 August   | 324.2(12.7)b  | 314.8(14.9)b  | 280.0(27.0)b  | 424.6(25.4)a |                         |    |    |
|                                                                                         | 2008 February | 130.9(24.1)a  | 142.5(21.4)a  | 53.1(5.2)b    | 81.3(10.5)ab |                         |    |    |
|                                                                                         | 2008 August   | 352.3(8.8)    | 311.8(14.6)   | 382.1(33.4)   | 367.0(33.4)  | *                       | ns | ns |
|                                                                                         | 2009 February | 86.0(20.1)    | 97.8(20.3)    | 82.3(20.4)    | 152.6(36.0)  |                         |    |    |
|                                                                                         | 2009 August   | 305.0(23.4)b  | 405.9(41.9)ab | 404.7(32.5)ab | 432.1(29.2)a |                         |    |    |

Notes: Values are means with standard error in parentheses (n = 5). February and August is within the dry and wet season, respectively in the study region. Different lowercase letters represent significant difference among the treatments. ‘\*\*\*’, ‘\*’ and ‘ns’ represent statistical difference of  $P < 0.01$ ,  $P < 0.05$  and  $P > 0.05$ , respectively.

**Table S4.** Effects of N and P addition on soil properties in different sampling periods in the pine forest.

| Statistical analyses                                                                    |               | One-way ANOVA |             |               |             | Repeated measures ANOVA |    |    |
|-----------------------------------------------------------------------------------------|---------------|---------------|-------------|---------------|-------------|-------------------------|----|----|
|                                                                                         |               | Treatment     | C           | N             | P           | NP                      | N  | P  |
| pH                                                                                      | 2007 August   | 4.1(0.0)      | 4.1(0.0)    | 4.1(0.1)      | 4.0(0.0)    |                         |    |    |
|                                                                                         | 2008 February | 4.0(0.0)ab    | 3.9(0.0)b   | 4.0(0.0)a     | 3.9(0.0)ab  |                         |    |    |
|                                                                                         | 2008 August   | 4.0(0.0)      | 4.0(0.0)    | 4.0(0.1)      | 4.0(0.0)    | ns                      | ns | ns |
|                                                                                         | 2009 February | 3.9(0.1)      | 3.8(0.0)    | 4.0(0.0)      | 3.9(0.0)    |                         |    |    |
|                                                                                         | 2009 August   | 4.0(0.0)      | 4.0(0.0)    | 3.9(0.0)      | 3.9(0.0)    |                         |    |    |
| NH <sub>4</sub> <sup>+</sup><br>(mg kg <sup>-1</sup> )                                  | 2007 August   | 10.6(1.4)     | 9.8(1.5)    | 12.9(1.1)     | 10.9(1.6)   |                         |    |    |
|                                                                                         | 2008 February | 10.9(0.3)b    | 14.8(1.2)ab | 12.4(0.8)ab   | 16.3(1.4)a  |                         |    |    |
|                                                                                         | 2008 August   | 3.2(0.4)a     | 1.7(0.4)ab  | 1.5(0.4)b     | 2.2(0.1)ab  | ns                      | ns | ns |
|                                                                                         | 2009 February | 12.2(0.8)a    | 10.4(0.6)ab | 8.3(0.6)b     | 9.6(0.6)b   |                         |    |    |
|                                                                                         | 2009 August   | 7.0(0.7)      | 5.7(0.3)    | 6.2(0.3)      | 5.6(0.3)    |                         |    |    |
| NO <sub>3</sub> <sup>-</sup><br>(mg kg <sup>-1</sup> )                                  | 2007 August   | 3.9(0.7)      | 4.7(0.9)    | 2.9(1.3)      | 4.8(0.9)    |                         |    |    |
|                                                                                         | 2008 February | 1.3(0.2)b     | 2.7(0.4)ab  | 1.1(0.1)b     | 3.3(0.7)a   |                         |    |    |
|                                                                                         | 2008 August   | 0.5(0.1)      | 0.5(0.0)    | 0.3(0.1)      | 0.4(0.1)    | *                       | ns | ns |
|                                                                                         | 2009 February | 5.3(0.5)a     | 4.7(0.3)ab  | 4.0(0.2)b     | 4.1(0.2)ab  |                         |    |    |
|                                                                                         | 2009 August   | 3.4(0.2)      | 3.3(0.2)    | 3.4(0.3)      | 3.5(0.5)    |                         |    |    |
| NH <sub>4</sub> <sup>+</sup><br>+NO <sub>3</sub> <sup>-</sup><br>(mg kg <sup>-1</sup> ) | 2007 August   | 14.5(1.9)     | 14.5(2.2)   | 15.8(2.3)     | 15.7(1.5)   |                         |    |    |
|                                                                                         | 2008 February | 12.2(0.5)b    | 17.5(1.2)a  | 13.4(0.9)b    | 19.5(1.1)a  |                         |    |    |
|                                                                                         | 2008 August   | 3.7(0.5)a     | 2.2(0.4)ab  | 1.9(0.5)b     | 2.6(0.1)ab  | ns                      | ns | ns |
|                                                                                         | 2009 February | 17.6(1.2)a    | 15.1(0.7)ab | 12.3(0.6)b    | 13.7(0.7)b  |                         |    |    |
|                                                                                         | 2009 August   | 10.38(0.7)    | 9.0(0.3)    | 9.6(0.4)      | 9.1(0.3)    |                         |    |    |
| Available<br>P<br>(mg kg <sup>-1</sup> )                                                | 2007 August   | 2.9(0.2)b     | 2.6(0.5)b   | 15.9(3.1)a    | 13.1(3.7)a  |                         |    |    |
|                                                                                         | 2008 February | 0.4(0.0)b     | 0.5(0.0)b   | 1.7(0.2)a     | 1.6(0.3)a   |                         |    |    |
|                                                                                         | 2008 August   | 0.7(0.2)b     | 0.6(0.1)b   | 5.7(1.7)a     | 5.2(1.7)a   | ns                      | ** | ns |
|                                                                                         | 2009 February | 4.8(1.4)bc    | 3.7(1.3)c   | 12.7(2.4)ab   | 13.4(2.4)a  |                         |    |    |
|                                                                                         | 2009 August   | 0.5(0.1)      | 0.3(0.1)    | 2.6(0.7)      | 2.7(1.0)    |                         |    |    |
| Soil<br>organic C<br>(%)                                                                | 2007 August   | 3.0(0.1)      | 2.6(0.1)    | 3.3(0.1)      | 3.0(0.4)    |                         |    |    |
|                                                                                         | 2008 February | 3.5(0.2)ab    | 4.5(0.3)a   | 3.3(0.3)b     | 4.5(0.3)a   |                         |    |    |
|                                                                                         | 2008 August   | 3.3(0.2)c     | 5.1(0.3)a   | 3.6(0.3)bc    | 4.5(0.3)ab  | *                       | ns | ns |
|                                                                                         | 2009 February | 3.4(0.3)ab    | 2.9(0.4)b   | 3.3(0.1)ab    | 4.2(0.4)a   |                         |    |    |
|                                                                                         | 2009 August   | 3.2(0.4)      | 3.1(0.2)    | 3.4(0.3)      | 3.6(0.4)    |                         |    |    |
| Microbial<br>biomass C<br>(mg kg <sup>-1</sup> )                                        | 2007 August   | 329.4(32.1)   | 306.5(38.6) | 277.0(23.1)   | 296.9(39.0) |                         |    |    |
|                                                                                         | 2008 February | 30.6(4.2)b    | 51.9(4.4)ab | 81.7(12.0)ab  | 94.0(22.1)a |                         |    |    |
|                                                                                         | 2008 August   | 496.7(22.8)   | 430.9(60.4) | 371.0(41.9)   | 383.6(35.1) | ns                      | ns | ns |
|                                                                                         | 2009 February | 151.0(37.0)a  | 74.7(12.6)b | 102.6(18.8)ab | 77.4(8.4)b  |                         |    |    |
|                                                                                         | 2009 August   | 523.6(41.8)   | 507.6(44.1) | 468.8(43.1)   | 488.9(22.6) |                         |    |    |

Notes: Values are means with standard error in parentheses (n = 5). February and August is within the dry and wet season, respectively in the study region. Different lowercase letters represent significant difference among the treatments. ‘\*\*\*’, ‘\*’ and ‘ns’ represent statistical difference of  $P < 0.01$ ,  $P < 0.05$  and  $P > 0.05$ , respectively.
